# Supplementary material
Source: publisher figshare collection journal article supplement (https://acs.figshare.com/ndownloader/files/5218135)

## Photochemical Production of Nitric Oxide via Two Photon Excitation with NIR light.

Stephen Wecksler, Alexander Mikhailovsky, Peter C. Ford\*

*Department of Chemistry and Biochemistry, University of California, Santa Barbara*

*Santa Barbara, CA 93106-9510 (e.mail: ford@chem.ucsb.edu)*

Figure S-1 (a) Electronic spectra of PPIX (13.5  $\mu$ M), DME-PPIX (11.6  $\mu$ M), and **PPIX-RSE** (13.3  $\mu$ M) in tetrahydrofuran solution.

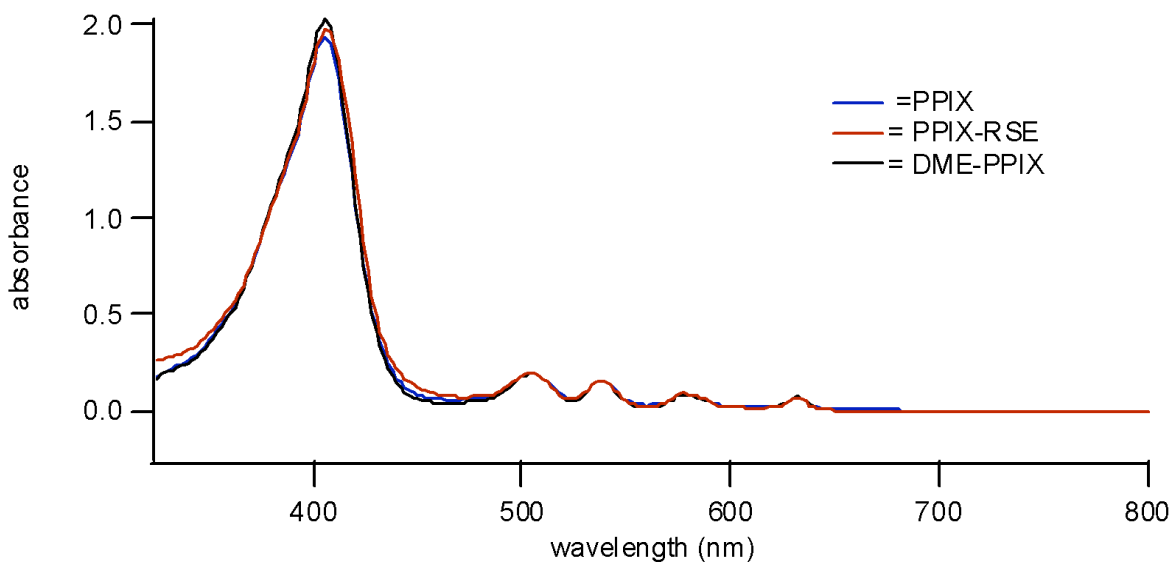

Supplement: Supplementary file 1 [file 5218135]
